1 ***Evaluation of copy number burden in specific epilepsy types from a genome-***  
2 ***wide study of 18,564 subjects***

3 Lisa-Marie Niestroj<sup>1</sup>, Daniel P. Howrigan<sup>2</sup>, Eduardo Perez-Palma<sup>1</sup>, Elmo Saarentaus<sup>3</sup>, Peter  
4 Nürnberg<sup>1,4,5</sup>, Remi Stevelink<sup>6,7</sup>, Mark J. Daly<sup>2,3,8</sup>, Aarno Palotie<sup>2,3,8</sup>, Dennis Lal<sup>\*1,2,8,9,10</sup>, Epi25  
5 Collaborative

6

7 <sup>1</sup>Cologne Center for Genomics (CCG), University of Cologne, Cologne, 50931, Germany

8 <sup>2</sup>Broad Institute of MIT and Harvard, Cambridge, MA 02142, USA.

9 <sup>3</sup>Institute for Molecular Medicine Finland (FIMM), University of Helsinki, Helsinki, FI-00014,  
10 Finland.

11 <sup>4</sup>Center for Molecular Medicine Cologne (CMMC), University of Cologne, Cologne, 50931,  
12 Germany.

13 <sup>5</sup>Cologne Excellence Cluster on Cellular Stress Responses in Aging-Associated Diseases  
14 (CECAD), University of Cologne, Cologne, 50931, Germany.

15 <sup>6</sup>Department of Child Neurology, Brain Center Rudolf Magnus, University Medical Center  
16 Utrecht, Utrecht, Netherlands.

17 <sup>7</sup>Department of Genetics, Center for Molecular Medicine, University Medical Center Utrecht,  
18 Utrecht, Netherlands.

19 <sup>8</sup>Genomic Medicine Institute, Lerner Research Institute, Cleveland Clinic, Cleveland, OH  
20 44106, USA.

21 <sup>9</sup>Epilepsy Center, Neurological Institute, Cleveland Clinic, Cleveland, OH 44106  
22 USA.

23 <sup>10</sup>Stanley Center for Psychiatric Research, Broad Institute of MIT and Harvard, Cambridge,  
24 MA 02142, USA.

25

26

27 **Correspondence:** lald@ccf.org

1 **Abstract**

2

3 Rare and large copy number variants (CNVs) around known genomic 'hotspots' are strongly  
4 implicated in epilepsy etiology. But it remains unclear whether the observed associations are  
5 specific to an epilepsy phenotype, and if additional risk signal can be found outside hotspots.

6 Here, we present the largest CNV burden and first CNV breakpoint level association analysis  
7 in epilepsy to date with 11,246 European epilepsy cases and 7,318 ancestry-matched  
8 controls. We studied five epilepsy phenotypes: genetic generalized epilepsy, lesional focal  
9 epilepsy, non-acquired focal epilepsy, epileptic encephalopathy, and unclassified epilepsy.

10 We discovered novel epilepsy-associated CNV loci and further characterized the CNV  
11 burden enrichment among phenotype-specific epilepsies. Finally, we provide evidence for  
12 deletion burden outside of known hotspot regions and show that CNVs play a significant role  
13 in the genetic architecture of lesional focal epilepsies.

14

15

## 1 **Introduction**

2

3 Characterized by recurrent and unprovoked seizures, epilepsy is the third most common  
4 neurological disorder, affecting roughly 65 million people worldwide<sup>1</sup>. The cause of epilepsy  
5 is unknown in many patients and can be the result of a variety of insults that perturb brain  
6 function. Along with acquired causes such as trauma, infectious diseases and autoimmune  
7 diseases, genetic variants play a major role in the disease etiology<sup>2</sup>. To date, approximately  
8 100 genes have been associated with epilepsy<sup>2,3</sup>.

9

10 The clinical representation of epilepsy is heterogeneous and subtype classification can be  
11 challenging. The epilepsies can be grouped into four major phenotypes<sup>4</sup>: (1) genetic  
12 generalized epilepsies (GGE), (2) focal epilepsies with non-acquired focal epilepsies (NAFE)  
13 and lesional focal epilepsies (LFE), (3) developmental and epileptic encephalopathies  
14 (DEE), and (4) unclassified epilepsies (UE). Among all epilepsy phenotypes, the DEE group  
15 has the poorest prognosis<sup>4,5</sup>.

16

17 In the last decade, many genetic studies have established that single nucleotide variants can  
18 confer risk or cause epilepsy<sup>2,6</sup>. Disease causing de novo variants have been reported in  
19 patients with DEE<sup>7</sup> and seizure susceptibility variants have been identified in GGE (for a  
20 review see<sup>8</sup>. Focal epilepsies have been associated with germline, somatic and mosaic  
21 pathogenic variants in e.g. *PCDH19*<sup>9</sup>, *LGI1*, *SCN1A* and *CHRNA4* (for a review see Helbig  
22 et al., 2016<sup>10</sup>) and especially in genes associated with the mechanistic target of rapamycin  
23 (mTOR) pathway<sup>11,12</sup>.

24

25 Additionally, rare copy number variants (CNVs) are strongly implicated in the etiology of  
26 epilepsy. Around four to eight percent of DEE patients carry pathogenic CNVs<sup>13,14</sup> and CNVs  
27 at genomic hotspots such as 15q13.3, 15q11.2, 16p11.2, 16p13.11 and 22q11.2 have been  
28 associated with GGE<sup>15-22</sup>. Rare genic CNVs were found in ~10% of GGE patients<sup>13,18,23</sup> and

1 CNVs greater than one megabase (Mb) were significantly enriched in patients compared to  
2 controls<sup>13,14,17,24</sup>. Deletions at 15q13.3, 15q11.2 and 16p13.11 are rarely seen in patients with  
3 DEE, highlighting the notion that the major phenotypes of epilepsy have different genetic  
4 architectures<sup>25</sup>. Non-recurrent deletions in *RBFOX1* have been additionally found in patients  
5 with focal epilepsies<sup>26</sup> and the 16p13.11 deletion was found in a study including GGE,  
6 NAFE, and LFE patients combined<sup>14</sup>. However, no significant CNV association has been  
7 identified to date with NAFE<sup>22</sup> and the role of CNVs in LFE has not been studied at large  
8 scale.

9

10 To date, all of the current epilepsy CNV associations have been identified through candidate  
11 loci screens, as genome-wide scans were under-powered to confirm significant genetic  
12 associations of low frequency CNVs (<1%) with epilepsy. In addition, the vast majority of  
13 CNV association studies have focused on deletions and not duplications. Lastly, no large-  
14 scale study uniformly processed or analyzed several types of epilepsy with the same  
15 genotyping platform and analysis protocol, which would enable robust comparisons across  
16 epilepsy phenotypes.

17

18 Here, we performed a large genome-wide analysis and the first CNV breakpoint association  
19 analysis of both deletions and duplications in five different epilepsy phenotypes (n=11,246  
20 cases and 7,318 controls), to decipher epilepsy phenotype-specific patterns as well as to  
21 discover novel epilepsy-associated CNV loci.

22

1 **Methods**

2

3 Sample Ascertainment:

4 Patients:

5 Epilepsy patients and associated clinical data (n = 13,454) were ascertained from clinics  
6 distributed throughout Europe (37 sites), North America, Oceania and Asia as part of an  
7 ongoing collaborative effort by the Epi25 Consortium. Subjects were assessed for a  
8 diagnosis of developmental and epileptic encephalopathies (DEE), genetic generalized  
9 epilepsy (GGE), non-acquired focal epilepsy (NAFE), lesional focal epilepsy (LFE), with all  
10 patients having a nonspecific epilepsy diagnosis defined here as unclassified epilepsy (UE).

11

12 DEE comprised subjects with severe refractory epilepsy of unknown etiology with  
13 developmental plateauing or regression, no epileptogenic lesion on MRI, and with  
14 epileptiform features on EEG. As this is the group with the largest number of gene  
15 discoveries to date, we encouraged inclusion of those with negative epilepsy gene panel  
16 results, but we did not exclude those without prior testing.

17

18 Diagnosis of GGE required a history of generalized seizure types (generalized tonic-clonic,  
19 absence, or myoclonus seizures) and generalized epileptiform discharges on EEG. We  
20 excluded cases with evidence of focal seizures, or with moderate to severe intellectual  
21 disability and those with an epileptogenic lesion on neuroimaging (although neuroimaging  
22 was not obligatory). If EEG was not available, then only cases with an archetypal clinical  
23 history as judged by the phenotyping committee (e.g. morning myoclonus and generalized  
24 tonic-clonic seizures) were accepted.

25

26 Diagnosis of NAFE required a convincing history of focal seizure types, an EEG with focal  
27 epileptiform or normal findings, and neuroimaging showing no epileptogenic lesion or

1 hippocampal sclerosis (MRI was preferred but CT was accepted). Exclusion criteria were a  
2 history of primarily generalized seizures or moderate to severe intellectual disability.

3  
4 LFE compromised subjects with a convincing history of focal seizure types, an EEG with  
5 focal epileptiform or normal findings, and neuroimaging showing an epileptogenic lesion  
6 such as a low-grade brain tumor or a focal cortical dysplasia.

7  
8 Patients with an UE diagnosis did not fulfill criteria for any of the aforementioned epilepsy  
9 phenotypes due to absence of critical data or conflicting data and are therefore under review  
10 or were labeled excluded.

11  
12 Patients or their legal guardians provided signed informed consent according to local  
13 national ethical requirements. This study was approved by the institutional review boards of  
14 all participating sites (see Supplement). Samples had been collected over a 20-year period  
15 in some centers, so the consent forms reflected standards at the time of collection. Samples  
16 were only accepted if the consent did not exclude data sharing (see details in exome study  
17 using similar patient cohort <https://www.biorxiv.org/content/early/2019/01/21/525683.full.pdf>  
18 ). Part of the dataset was published in dbGaP (phs001489.v1.p1).

19  
20 Controls:  
21 Additional control subjects (n = 12,857) were obtained from three external large-scale  
22 genetic studies, specifically selected because genotyping was performed on the same  
23 genotyping array (Illumina Infinium Global Screening Array) and at the same center (Broad  
24 Institute) as the epilepsy cases. Controls provided as part of this study: 1) Genomic  
25 Psychiatry Cohort (GPC) controls, 2) FINRISK controls and 3) Helmsley Irritable Bowel  
26 Disease (IBD) cases and controls. For detailed description see Supplement.

27  
28 Genotyping:

1 Samples selected for this study were all genotyped on the GSA-MD v1.0 (Illumina, San  
2 Diego, CA, USA) in separate batches. A total of 688,032 markers were used for quality  
3 control (QC).

#### 4 Genotype Sample QC:

5 To correct for population stratification, we performed an initial round of QC based on SNP  
6 genotype data for 13,420 epilepsy cases and 12,857 controls. Samples with a call rate <  
7 0.96 or discordant sex status were excluded. We filtered autosomal SNPs for low genotyping  
8 rate (> 0.98), case-control difference in minor-allele frequency (> 0.05), and deviation from  
9 Hardy-Weinberg equilibrium (HWE, p-value ≤ 0.001) before pruning SNPs for linkage  
10 disequilibrium (--indep-pairwise 200 100 0.2) using PLINK v1.9<sup>27</sup> in order to perform  
11 Principal Component Analysis (PCA) to assess for population stratification. Samples with  
12 non-European ancestry were excluded based on visual clustering of the PCA.

#### 13 CNV Calling:

14 We focused only on autosomal CNVs due to higher quality of CNV calls from nonsex  
15 chromosomes<sup>28</sup>. We created GC wave-adjusted LRR intensity files for all samples using  
16 PennCNV, and employed PennCNV's CNV calling algorithms<sup>29</sup> to detect CNVs in our  
17 dataset. We generated a custom population B-allele frequency file before calling CNVs.  
18 Adjacent CNV calls were merged if the number of intervening markers between them was  
19 less than 20% of the total number when both segments were combined.

20

#### 21 Intensity Sample QC:

22 Intensity-based QC was conducted to remove samples with low quality data based on the  
23 following empirically defined thresholds across three different metrics: Thresholds for (1)  
24 waviness factor, (2) Log-R ratio standard deviation, and (3) B-allele frequency drift were  
25 calculated by taking the median +3x SD to determine outlying samples as performed in  
26 Huang et al.<sup>30</sup>. Following intensity-based QC, all samples had an Log-R ratio standard

1 deviation of  $< 0.25$ , absolute value of waviness factor  $< 0.04$ , and a B-allele frequency drift  $<$   
2  $0.007$ .

3

#### 4 CNV-load Sample QC:

5 We performed a final round of sample QC by removing additional samples with excessively  
6 high CNV load based on the total number of CNV calls ( $>100$ ). This threshold was  
7 determined empirically by visual inspection of distributions across all datasets combined.  
8 Our final dataset after sample QC comprised 18,564 samples: 11,246 epilepsy cases and  
9 7,318 controls (DEE = 1,315; GGE = 3,637; LFE = 1,267; NAFE = 4,520; UE = 507).

10

#### 11 Call Filtering and Delineation of Rare CNVs:

12 CNV calls were removed from the dataset if they spanned less than 20 markers, were less  
13 than 20Kb in length, had a SNP density  $< 0.0001$  (amount of markers/length of CNV) or  
14 overlapped by more than 0.5 of their total length with regions known to generate artifacts in  
15 SNP-based detection of CNVs<sup>31</sup>. This included immunoglobulin domain regions, telomeric  
16 regions (defined as 500Kb from the chromosome ends), and centromeric regions  
17 (coordinates were provided by PennCNV for hg19). Further, we excluded CNVs overlapping  
18  $> 80\%$  of regions known to be recurrent copy number variations in the general population  
19 (11,732 CNVs from <http://dgv.tcag.ca/dgv/app/home>) for a part of the analyses (see “CNV  
20 Burden Analysis”). Additionally, all CNV calls spanning more than 20 markers and equal to  
21 or more than 1Mb in length were included in the analysis even if the SNP density was  $<$   
22  $0.0001$ <sup>30,31</sup>.

23

24 We assigned all CNV calls a specific frequency count using PLINK v.1.07<sup>32</sup>, with the option -  
25 -cnv-freq-method2 0.5. Here, the frequency count of an individual CNV is determined as 1 +  
26 the total number of CNVs overlap by at least 50% of its total length (in bp), irrespective of  
27 CNV type. We then filtered our callset for rare CNVs with MAF  $< 1\%$  (a frequency of 186 or  
28 lower across 18,564 samples).



1

2 After CNV quality control, 12,765 of 18,564 (7,748 cases and 5,017 controls) QC-passed  
3 individuals had one or more rare CNVs.

4

5 CNV Annotation:

6 CNVs were annotated for gene content and recurrent deletion hotspots for epilepsy and  
7 neurodevelopmental disorders (NDD) with various annotation files including gene name and  
8 the corresponding coordinates in hg19 assembly using in-house perl scripts (available on  
9 request). We annotated 89 genes that were previously associated with epilepsy<sup>2,3</sup>, 93 genes  
10 associated with NDD<sup>33</sup>, 2,680 genes intolerant for protein truncating variants defined as pLI  
11 > 0.95<sup>34</sup> (probability of loss-of-function intolerance [pLI] score > 0.95), >28,000 annotated  
12 regions from UCSC refseq genes, eight recurrent hotspot deletion regions for epilepsy and  
13 six recurrent hotspot regions for NDD<sup>35</sup>. We only considered a CNV as “coding” if it  
14 overlapped 80% of a gene<sup>36</sup>. We considered all other CNVs as “non-genic”.

15

16 Cytogenic testing is well-established for diagnostic evaluation of patients with  
17 neurodevelopmental disorders including epilepsies. It is generally established that large  
18 deletions, deletions intersecting haploinsufficient genes, and large duplications are  
19 considered as likely pathogenic for epilepsy<sup>37</sup>. Therefore, we considered a CNV as “likely  
20 pathogenic” as defined by ACMG guidelines<sup>38</sup>, i.e. if its length exceeded 2Mb, it overlapped  
21 a known hotspot region for epilepsy, a gene with pLI > 0.95, or a known epilepsy-associated  
22 gene.

23

24 CNV Burden Analysis:

25 We measured CNV burden for all five epilepsy phenotypes using three separate categories  
26 to evaluate relative contribution on epilepsy type risk: (1) the total length of all rare CNVs  
27 within an individual (CNV length), (2) the carrier status of rare CNVs intersecting genes and

1 neurodevelopmental or epilepsy associated CNVs hotspot regions, and (3) the carrier status  
2 of rare likely pathogenic CNVs. For length and CNV burden in different gene and hotspot  
3 lists, deletions and duplications were analyzed separately. For likely pathogenic CNV burden  
4 duplications and deletions were analyzed according to the definition of “likely pathogenic”  
5 CNVs mentioned before. To assess for a CNV burden difference between epilepsy cases  
6 and controls, we fitted a logistic binomial (for hotspot regions including CNVs from the  
7 general population) or Poisson (for gene lists and likely pathogenic CNV burden excluding  
8 CNVs from the general population) regression model using the “glm” function of the stats  
9 package (<https://github.com/SurajGupta/r-source/tree/master/src/library/stats/R>) in R for  
10 common and rare CNVs respectively<sup>30</sup>:

$$11 \quad y \sim \text{sex} + \text{CNV burden}$$

12 where ‘y’ is a dichotomous outcome variable (epilepsy type = 1, control = 0); ‘sex’ is used as  
13 a covariate and ‘CNV burden’ represents one of the categories mentioned above. For all  
14 burden analyses, ORs, 95% confidence intervals (CIs), and significance were calculated.  
15 ORs were calculated by taking the exponential of the logistic regression coefficient. ORs  
16 above one indicate an increased risk for the specific epilepsy type per unit of CNV burden.  
17 Significance threshold was corrected for multiple testing using Bonferroni correction.  
18 Bonferroni multiple-testing threshold for significance was calculated combined for all  
19 epilepsy phenotypes and CNV types for all three categories ((1) CNV length burden  $p <$   
20  $1.6e-3$ ; (2) genome-wide burden  $p < 8.33e-4$ ; (3) likely pathogenic CNV burden  $p < 0.01$ ).

21

### 22 Regression of Potential Confounds on Case-Control Ascertainment:

23 It is important to ensure that any bias in gender and ancestry does not drive spurious  
24 associations with epilepsy. To ensure the robustness of the analysis, CNV burden analyses  
25 included potential confounding variables as covariates in a logistic regression framework.  
26 Due to the number of tests run at breakpoint level association, we employed a step-wise  
27 logistic regression approach to allow for the inclusion of covariates in our case-control  
28 association, as previously described in Marshall and Howrigan et al.<sup>31</sup>, which we term the

1 epilepsy residual phenotype. Covariates included sex for burden and breakpoint association  
2 analysis and the first ten ancestry principal components for breakpoint association analysis.

3

4 To calculate the epilepsy residual phenotype, we first fitted a logistic regression model of  
5 covariates to affection status, and then extracted the Pearson residual values for use in a  
6 quantitative association design for downstream analyses. Residual phenotype values in  
7 cases are all above zero, and controls below zero, and are plotted against overall Kb burden  
8 in Figure S1.

9

#### 10 CNV Breakpoint Level Association:

11 The CNV breakpoint level association was performed by quantifying the frequencies of case  
12 and control CNV carriers at all unique CNV breakpoint locations (i.e., the SNP probe defining  
13 the start and end of the CNV segment); the full set of CNV breakpoints represents the  
14 genome-wide space of CNV variation between cases and controls.

15

16 CNV breakpoint level association was run using the epilepsy residual phenotype as a  
17 quantitative variable, with significance determined through 1,000,000 permutations of  
18 phenotype residual labels using PLINK v1.07<sup>32</sup>. An additional z-scoring correction was used  
19 to efficiently estimate two-sided empirical  $p$ -values for highly significant loci. A fraction of our  
20 controls were patients from an Irritable Bowl Disease (IBD) project, and therefore to rule out  
21 confounding, we ran the same CNV breakpoint level association for the “IBD-controls” from  
22 the Helmsley dataset (since these represent IBD cases) and used them as cases to test  
23 association using the remaining controls as comparison group. IBD-related CNV breakpoints  
24 with  $p$ -values  $<10e-3$  after genome wide correction were removed from the combined  
25 analysis (epilepsy cases vs all controls including IBD fraction). Association tests were  
26 conducted for all CNV types, deletions, and duplications independently. CNVs spanning the  
27 centromere were merged to one. Bonferroni correction for multiple testing was used to  
28 identify significance threshold. Loci that surpassed genome-wide multiple testing correction

1 in either test were followed up by manual CNV quality evaluation: B-allele frequency and  
2 LogR-ratio were manually investigated using perl scripts provided by PennCNV and UCSC  
3 genome browser hg19 (<https://genome.ucsc.edu/>).

4

5 *Phenotype Analysis:*

6 The phenome-wide association study (PheWAS) design requires a good signal to noise ratio  
7 to discover novel CNV associations. To enrich for high confidence pathogenic CNVs, we  
8 tested the burden of big CNVs (>2Mb) in patients with a specific phenotype among the  
9 different epilepsy phenotypes. Based on the data collected through the Epi25 consortium,  
10 we were able to include 43 different phenotype categories in the PheWAS (see  
11 Supplementary Methods). *P*-values and ORs were obtained using a Fisher's Exact Test  
12 (two-sided). Multiple testing correction for 161 tests results in a significant p-value <  $3.1 \times 10^{-4}$ .  
13 We performed a meta-analysis for the association of GGE patients with big duplications (> 2  
14 Mb) with febrile seizures to exclude a possible center bias using the R package "metafor"  
15 (<https://cran.r-project.org/web/packages/metafor/metafor.pdf>).

16

17

## 1 Results

2

### 3 Elevated epilepsy type-specific CNV burden in DEE and GGE patients:

4 We applied logistic regression to investigate whether the five epilepsy phenotypes have on  
 5 average a greater genomic region covered (combined CNV length) by either deletions or  
 6 duplications. After correction for 30 tests, we found that patients with DEE and GGE showed  
 7 independent enrichment for total deletions of an overall length of >2Mb compared to controls  
 8 (DEE: OR 2.91 [1.63-4.72],  $p = 7.13e-5$ ; GGE: OR 1.85 [1.27-2.58],  $p = 6.5e-4$ ) (Figure 1A).  
 9 UE was the only epilepsy type with significant burden for duplications of an overall length of  
 10 >2Mb (OR 3.85 [2.71-5.3],  $p = 2.63e-15$ ; Figure 1B).

11

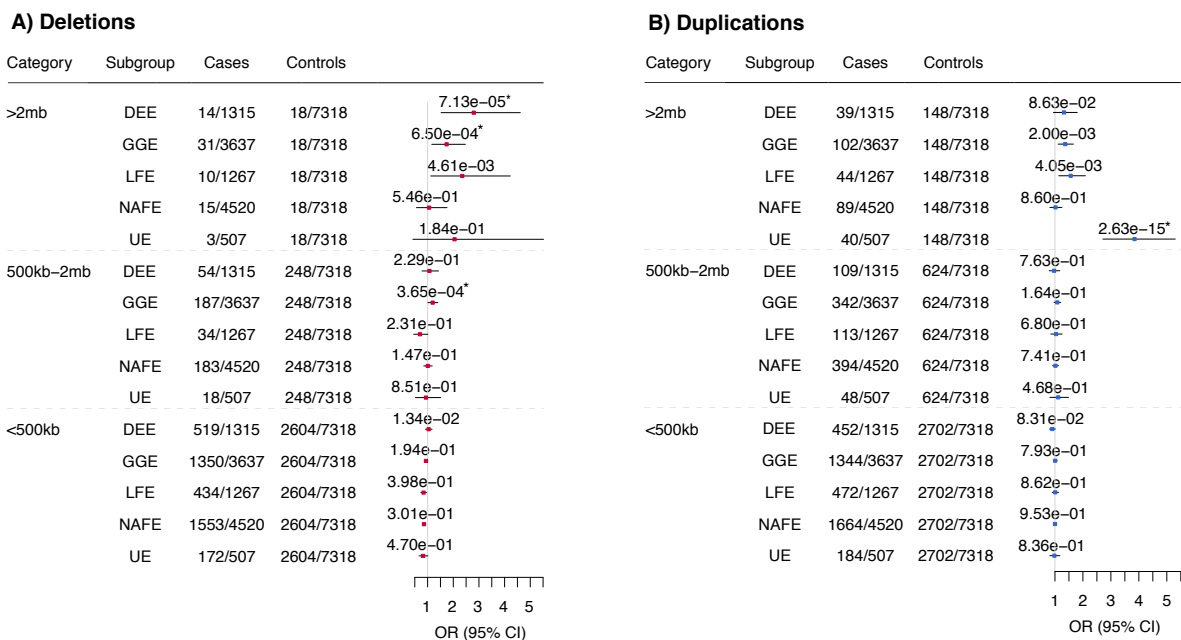

12

13 **Figure 1** Global burden of CNV by overall length across five epilepsy types. Rare CNV burden  
 14 observed in the different epilepsy types is shown for (A) deletions and (B) duplications. Odds ratios  
 15 (ORs) and p-values were calculated using a Poisson logistic regression for rare CNVs with sex as a  
 16 covariate in three different categories (overall genomic sequence loss in one individual of >2Mb,  
 17 500Kb-2Mb and <500Kb). DEE = Developmental and epileptic encephalopathies; GGE = Genetic  
 18 generalized epilepsies; LFE = Lesional focal epilepsies; NAFE = Non-acquired focal epilepsies; UE =

1 Unclassified epilepsies; \* = p values surpassing the Bonferroni multiple testing for 30 tests cut-off (\*p<  
2 1 .63<sup>-3</sup>).

3

4 *Enrichment of gene-sets and CNV hotspots in DEE, GGE, and NAFE patients:*

5 Next, we measured if the CNV burden was concentrated within defined sets of genes and  
6 known deletion hotspots for epilepsy (Epi) and neurodevelopmental disorders (NDD).  
7 Compared to deletions identified in the controls, we found that the epilepsy hotspot list,  
8 genes intolerant for truncating variants, and coding regions were enriched for patient  
9 deletions (Figure 2). DEE and GGE patients showed a significant burden of deletions in  
10 genes with pLI > 0.95 (DEE: OR 1.85 [1.3-2.53], p = 2.78e-4; GGE: OR 1.58 [1.28-1.91], p =  
11 7.2e-6). Additionally, GGE patients showed an enrichment of deletions at previously  
12 identified epilepsy hotspots (OR 5.21 [3.59-7.7], p = 2.01e-17) and in coding regions (OR  
13 1.15 [1.07-1.24], p = 2.35e-4) but no significant enrichment of known epilepsy genes.  
14 Furthermore, we detected a significant deletion enrichment in NAFE patients at previously  
15 identified epilepsy deletion hotspots (OR 2.42 [1.61-3.69], p = 2.87e-5). In contrast, no  
16 enrichment was observed in any genes or loci tested when duplications were considered in  
17 any epilepsy phenotype (Figure S2).

18

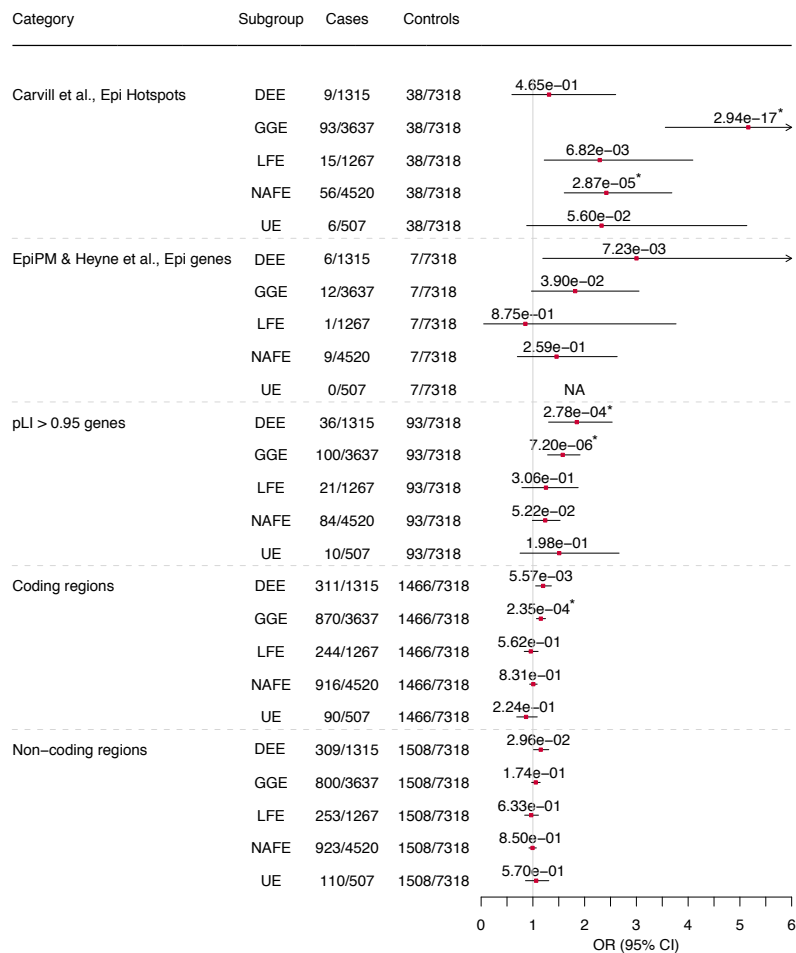

1

2 **Figure 2** The global burden of deletions across different gene sets, hotspot regions and non-coding

3 regions in five different epilepsy phenotypes. Common deletion burden was elucidated for epilepsy

4 hotspot regions<sup>35</sup> and rare (< 1% frequency) deletion burden was elucidated for all other gene lists

5 (Category). Odds ratios (ORs) and p-values were calculated using a binomial regression for common

6 CNVs and a Poisson regression for rare CNVs with sex as a covariate. CNVs are defined as “genic” if

7 they overlap 80% of a gene. Notably, not all individuals carry a CNV. (Results of CNV burden in NDD

8 hotspots and NDD genes are not shown due to very small sample sizes and no significance; results of

9 duplication burden are shown in Supplementary Figure 2). 95% CIs are clipped to arrows when they

10 exceed a specified limit. DEE = Developmental and epileptic encephalopathies; GGE = Genetic

11 generalized epilepsies; LFE = Lesional focal epilepsies; NAFE = Non-acquired focal epilepsies; UE =

12 Unclassified epilepsies; \* = p values surpassing the Bonferroni multiple testing for 60 tests cut-off (\*p

13 < 8.33e<sup>-4</sup>).

14

15

1 Enrichment of likely pathogenic CNVs in all epilepsy phenotypes:

2 For our next category, we evaluated the combined burden of the CNVs that are considered  
 3 in the literature as ‘likely pathogenic’ (according to ACMG, see “Methods” for selection  
 4 criteria) in the five studied epilepsy phenotypes. Likely pathogenic CNVs were identified in  
 5 6.08 % of DEEs, 7.67 % of GGEs, 5.92 % of LFEs, 4.67 % of NAFEs, and 9.27 % of UEs.  
 6 However, likely pathogenic CNVs were also present in 3.56 % of controls. Nevertheless, in a  
 7 direct comparison with the controls, we observed a significant enrichment of likely  
 8 pathogenic CNVs in all epilepsy phenotypes (Figure 3). The likely pathogenic CNV effect  
 9 size was greatest in patients with UE (OR 2.63 [1.92-3.52],  $p = 4.16e-10$ ; Figure 3), mainly  
 10 driven by large duplications (Figure 1B).

11

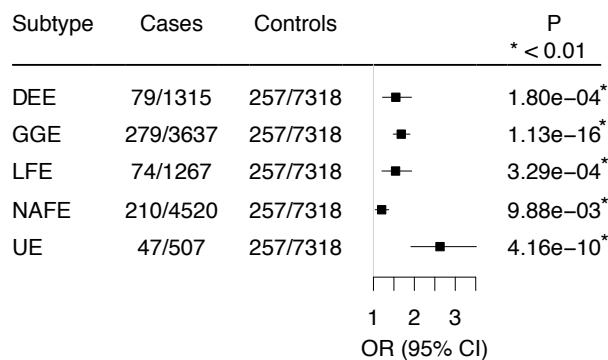

12

13 **Figure 3** Global burden of likely pathogenic CNVs across five different epilepsy phenotypes. Likely  
 14 pathogenic CNVs were defined as frequency < 1%,  $\geq 2$ Mb, deletions in known epilepsy hotspots,  
 15 deletions in known epilepsy genes, or deletions in genes with pLI > 0.95. Odds ratios (ORs) and p-  
 16 values were calculated using a poisson logistic regression for rare CNVs with sex as a co-variable.  
 17 Genic CNVs are defined as those that overlap 80% of any exon of a known protein-coding gene. DEE  
 18 = Developmental and epileptic encephalopathies; GGE = Genetic generalized epilepsies; LFE =  
 19 Lesional focal epilepsies; NAFE = Non-acquired focal epilepsies; UE = Unclassified epilepsies; \* = p  
 20 values surpassing the Bonferroni multiple testing for five tests cut-off ( $*p < 0.01$ ).

21

22



1 Genome-wide CNV breakpoint association reveals significant loci outside of known hotspot  
2 regions:

3 In total, five independent CNV loci in five epilepsy phenotypes surpassed genome-wide  
4 significance; four loci have been previously reported in association with GGE<sup>15-18</sup> and one  
5 has never been associated with epilepsy before. For three of the identified CNV loci we  
6 extended the phenotypic spectrum by identifying novel epilepsy phenotype associations. In  
7 line with previous results from candidate loci studies, our analysis showed that patients with  
8 GGE were most significantly enriched for deletions overlapping hotspot loci on  
9 chromosomes 15q13.2-q13.3 ( $p = 2.55e-08$ ) and 16p13.11 ( $p = 3.43e-08$ ; Figure 4A, Figure  
10 S4). We identified a duplication association with GGE that was located on chromosome 9,  
11 spanning 9p11.2, the centromere and 9q21.11 ( $p = 1.53e-07$ ; Figure 4B, Figure S4, S5), a  
12 locus associated for the first time with an epilepsy phenotype. The DEE analysis revealed a  
13 genome-wide significant duplication locus overlapping the recurrent region on chromosome  
14 15q11.2-q13.1 also known as the Prader-Willi/Angelman critical region ( $p = 2.15e-10$ ; Figure  
15 4B). No locus was significantly enriched in the NAFE cohort. Deletions in LFE patients were  
16 enriched at epilepsy hotspot 16p13.11 ( $p = 7.08e-08$ ; Figure 4A), and duplications also at  
17 9p11.2-9q21.11 ( $p = 1.09e-10$ ; Figure 4B; Figure S4, S5). Finally, the UE association  
18 analyses identified significant enrichment for duplications at 1q21.1 and 9p11.2-9q21.11 ( $p =$   
19  $3.30e-11$ ;  $p = 3.37e-18$ ; Figure 4B). To verify the novel duplication region 9p11.2-9q21.11  
20 significantly enriched in GGE, LFE and UE patients, we plotted the Log-R Ratio (LRR)  
21 intensity and B-Allele Frequency (BAF) of the probe-levels for a subset of six patients in  
22 Figure S5.

23

24

## A Deletions

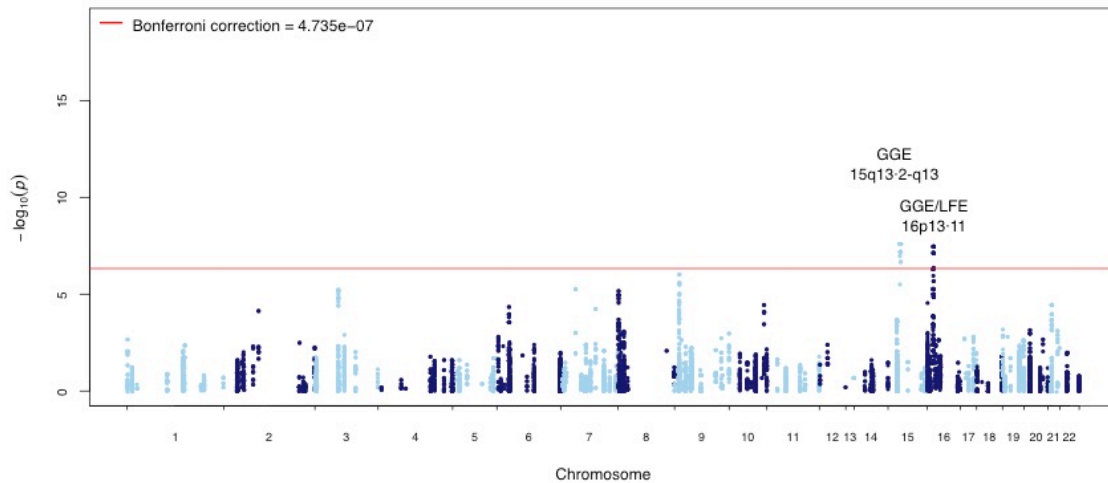

## B Duplications

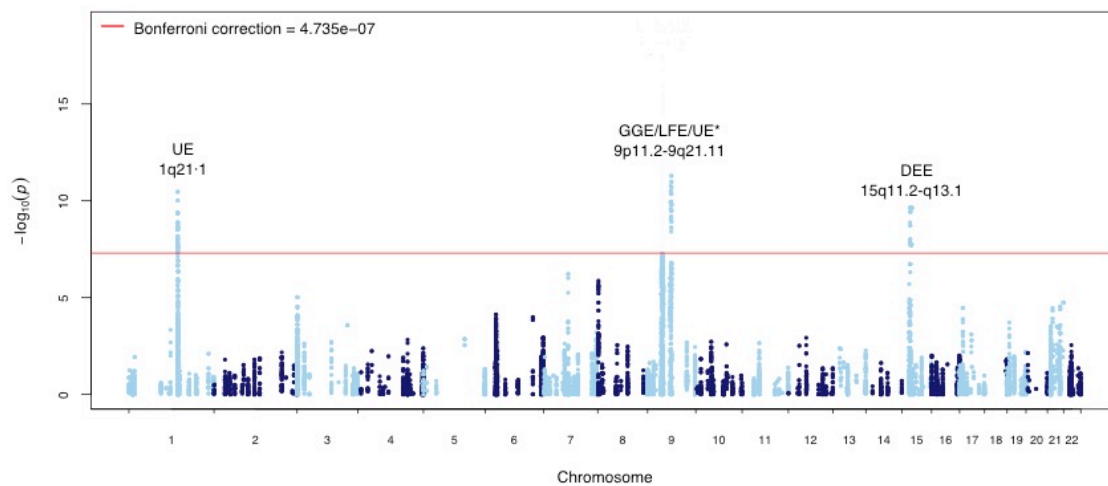

1

2

3 **Figure 4** Genome-wide CNV breakpoint association. Manhattan plot displaying the  $-\log_{10}$

4 deviance p-value for A) Genome-wide deletion breakpoint association for DEE, GGE, LFE, NAFE,

5 and UE and B) Genome-wide duplication breakpoint association for DEE, GGE, LFE, NAFE, and

6 UE. P-value cutoffs corresponding to correction for 105,596 tests at  $4.743 \times 10^{-7}$  are highlighted in red.

7 Loci significant after multiple test correction in the appropriate epilepsy type are labeled. \* = Two

8 association signals of the same duplication identified by the start- and end-breakpoint at 9p11.2 and

9 9q21.11 in GGE, LFE, and UE. DEE = Developmental and epileptic encephalopathies; GGE =

10 Genetic generalized epilepsies; LFE = Lesional focal epilepsies; NAFE = Non-acquired focal

11 epilepsies; UE = Unclassified epilepsies.

12

1 *PheWAS analysis reveals enrichment of large CNVs (> 2Mb) in epilepsy subtypes:*

2 We performed a phenome-wide association study (PheWAS) to identify an association  
3 between large effect CNVs and a large number of different phenotypes. We analyzed  
4 whether the CNV burden is enriched in any clinical phenotype within the five different  
5 epilepsy phenotypes. After multiple testing correction for 161 applied tests, we identified two  
6 significant associations. We observed a 3.25-fold enrichment of large duplications (> 2Mb) in  
7 patients with GGE and febrile seizures when comparing to GGE patients without febrile  
8 seizures (OR 3.25 [1.8-5.92],  $p = 4.07e-05$ ; Table S2). Further, a 2.72-fold enrichment of  
9 large duplications was detected for focal epilepsy patients with structural abnormalities  
10 versus without (OR 2.72 [1.57-4.56],  $p = 2.33e-04$ ; Table S2). An evaluation of types of  
11 lesions in this group showed that pathogenic CNVs are not specific to a single lesion type  
12 but found in patients with five different lesion types (Figure S6).

## 1 ***Discussion***

2 In this study, we identify several novel CNV-epilepsy associations using a case-control  
3 approach with >18,000 individuals genotyped on the same platform and analyzed with the  
4 same CNV calling, quality control, and analysis pipeline. We observe an increased burden of  
5 CNVs in different epilepsy phenotypes, report novel risk loci that surpass genome-wide  
6 multiple testing correction, and show that also LFE can be associated with an increased  
7 CNV burden. Consistent with results from genetic studies in other neurodevelopmental  
8 disorders, we show that novel risk loci lay at the ultra-rare end of the CNV frequency  
9 spectrum. Thus, larger samples will be needed to identify additional risk loci at convincing  
10 levels of statistical evidence<sup>30,31</sup>.

11

## 12 ***CNV Burden***

13 We and others have previously shown a burden of deletions overlapping genes associated  
14 with neurodevelopmental processes in patients with GGE, and that the signal was  
15 particularly concentrated within epilepsy hotspot loci<sup>15-22</sup>. In the present study we were able  
16 to replicate the original GGE signal with a significant enrichment for deletions in epilepsy  
17 hotspots. Additionally, we observed a significant deletion burden in genes intolerant for  
18 protein truncating variants in the general population, which has been suggested recently in a  
19 smaller cohort of 160 generalized, 32 focal, and six unclassified epilepsy patients<sup>39</sup>.  
20 Consistent with the well-established role of rare, large effect CNVs in the etiology of the  
21 severe and early onset DEEs<sup>13</sup>, we identified a significant deletion enrichment covering  
22 genes intolerant for truncating variants in the general population. Previous studies did not  
23 find significant differences between focal epilepsy patients and controls within hotspot loci,  
24 most likely due to the small sample size<sup>22</sup>. Here, we detect deletions overlapping epilepsy  
25 hotspot regions enriched in patients with NAFE. We observed enrichment for overall large  
26 duplications burden (>2Mb) for 6% of patients with UE, although we cannot exclude that a  
27 subset of patients may have a severe neurodevelopmental disease phenotype. This  
28 proportion is lower than in previous reports that identified that 15-20% of individuals with

1 unexplained neurodevelopmental disorders carry pathogenic CNVs<sup>40</sup>. Although epilepsy  
2 associated brain lesions have mainly been associated with somatic variants, which affect the  
3 mechanistic target of rapamycin (mTOR) pathway<sup>11,12</sup> also germline variants in *DEPDC5*  
4 have been identified as risk factors for lesional epilepsies. Here, we show that CNVs play a  
5 role in the etiology of LFE. The detected pathogenic CNVs were not specific to a single brain  
6 lesion, suggesting that the CNVs confer risk to the epilepsy rather than to the lesion itself.

7  
8 CNVs are present in most people and usually represent benign genetic variation without  
9 clinical significance<sup>41</sup>. Therefore, we concentrated on the burden of likely pathogenic CNVs  
10 that were 1.2-2.61-fold enriched in epilepsy patients. Although we used state-of-the-art  
11 criteria to support the categorization as 'likely pathogenic' CNV, the modest enrichment  
12 indicates that many population controls carry similar types of CNVs. This observation is in  
13 accordance with the presence of recurrent CNVs in epilepsy hotspot loci in healthy controls,  
14 suggesting an incomplete penetrance for epilepsy risk (Dibbens et al., 2009, Crawford et al.,  
15 2018). Additionally, detection of large gene-disrupting CNVs and epilepsy-associated gene  
16 deletions does not imply causality but rather increased susceptibility or incomplete  
17 penetrance. Many CNV hotspots and large-gene disrupting CNVs are known to be co-  
18 morbid with other disorders like intellectual disability (Mullen et al., 2013) and autism<sup>42-45</sup>, but  
19 we did not observe an enrichment of likely pathogenic CNVs in patients with these  
20 comorbidities in our cohort (data not shown). Interestingly, we found an enrichment of large  
21 duplications (>2Mb) in GGE patients with febrile seizures compared to GGE patients without  
22 febrile seizures (Table S2, Figure S3). Additional comorbidities in GGE patients with CNVs  
23 have been reported before (Mullen et al., 2013). Large duplications at 1q21.1, 22q11.2, and  
24 16p11.2 are known to be enriched in syndromic epilepsies<sup>46-48</sup>, suggesting that those GGE  
25 patients carry additional phenotypic co-morbidities.

26

27 *Genome-wide CNV breakpoint association*

1 Several recurrent CNVs have been previously associated with epilepsy<sup>15,16</sup>, however all have  
2 been identified in candidate loci studies. In this study, our sample size and uniform CNV  
3 calling pipeline allowed us to test CNV loci at genome-wide scale with adequate power at the  
4 CNV breakpoint level. Here, we performed the first genome-wide CNV breakpoint  
5 association analysis to identify associated loci among different epilepsy phenotypes. We  
6 replicated four of seven previously published locus-associations with epilepsy types at  
7 genome-wide significance level (1q21.1, 15q11.2, 15q13.3 and 16p13.11)<sup>15-18</sup>, whereas  
8 16p11.2, 16p12, and 22q11.2 only reached suggestive significance (p-value < 0.05),  
9 suggesting that larger datasets are needed to reach genome-wide significance. The majority  
10 of these previously established loci are co-morbid with other neurodevelopmental disorders  
11 such as schizophrenia, psychotic disorder, autism or intellectual disability<sup>31,49,50</sup>. Notably, our  
12 previous GGE CNV study re-evaluated clinical records of GGE patients carrying a 22q11.2  
13 deletion, revealing additional congenital and developmental features<sup>17</sup>. Possibly in this study,  
14 we used more stringent sample inclusion criteria with a smaller fraction of patients with  
15 comorbidities. This may explain why three out of seven recurrent loci were not significantly  
16 enriched in our analysis. Nonetheless, we show a significant association of deletions in  
17 16p13.11 with LFE. Previously, deletions of 16p13.11 were found to be enriched in  
18 candidate loci studies of GGE and CECTS (Childhood epilepsy with centrotemporal spikes)  
19 along with autism, intellectual disability, schizophrenia and additionally in non-lesional focal  
20 epilepsies<sup>15,18</sup>. The signal of non-lesional focal epilepsies could have been driven by  
21 misdiagnosed patients with small lesions undetectable by neuroimaging so that a lesional  
22 focal epilepsy might not have been confidently ruled out in these patients.

23

24 GGE, LFE and UE were associated with a genome-wide significant duplication spanning  
25 9p11.2, the centromere and 9q21.11, which has never been associated with epilepsy before.  
26 Both loci harbor genes highly expressed in the brain (9p11.2: FAM27E3; 9q21.11: e.g.  
27 PIP5K1B, APBA1). However, regions around the centromere of chromosome 9 (9p12, 9q13-  
28 q21.12) have also been repeatedly found and described as euchromatic cytogenetically

1 visible copy number variations (CG-CNVs)<sup>51,52</sup> in close proximity to the regions we identified.  
2 So far, these regions have been reported to be prone to benign CNVs and have not been  
3 associated with any phenotypic consequence before. Further large-scale studies will help to  
4 confirm this signal (see also Figure S5 for examples of CNVs at this region). CNVs covering  
5 the identified region and additional genomic regions have been associated with several  
6 severe syndromes. Among patients with 9p duplication syndrome characterized by growth  
7 and developmental delay<sup>53</sup>, a patient duplication covering 9p11.2 was described<sup>54</sup>. Typical  
8 characteristics for the 9p duplication syndrome include further microbrachcephaly, atypical  
9 face morphology, and delayed bone age<sup>55-57</sup>. Wilson and colleagues proposed that the  
10 spectrum of clinical severity in the 9p duplication syndrome roughly correlates with the extent  
11 of trisomic chromosome material (Wilson et al., 1985), which could explain a milder  
12 phenotype for our LFE and UE patients with duplication of loci 9p11.2 and not the entire  
13 chromosome arm. The 9p11.2-9q21.11 duplication is enriched in epilepsy patients similar to  
14 the 15q.11.2 deletion, as it is present in the general population but clearly enriched in people  
15 with various neuropsychiatric disorders and idiopathic generalized epilepsies implicating that  
16 this CNV acts as a risk factor instead of a large effect variant.

17

18

### 19 Study limitations

20 It is important to note that CNV breakpoints in the current study are estimated from  
21 genotyped SNPs around the true breakpoint, and these breakpoint estimates are limited by  
22 the resolution of the genotyping platform. Last, we recognize that especially small structural  
23 variants are not detectable with current genotyping platforms<sup>58</sup>. New technologies for whole-  
24 genome sequencing will ultimately enable the assessment of the contribution of a wider  
25 array of rare variants, including balanced re-arrangements, small CNVs<sup>59</sup> and short tandem  
26 repeats<sup>60</sup>.

27

### 28 Summary

1 Large-scale collaborations in epilepsy genetics have greatly advanced discovery through  
2 genome-wide association studies. Here, we have extended this framework to rare CNVs in  
3 five different epilepsy phenotypes including stringent ancestry and data quality control  
4 criteria, after generating the data under the same genotype array and calling pipeline for  
5 each subject. Our results help to refine the list of promising candidate CNVs associated with  
6 specific epilepsy types and extend the phenotypic spectrum for identified loci. We are  
7 confident that the application of this framework to even larger datasets has the potential to  
8 advance the discovery of loci and identification of the relevant genes and functional  
9 elements.



1 **Author Contribution**

2 Conceptualization: L.M.N., D.L., E.C.;

3 Methodology: L.M.N., D.L., E.C.;

4 Software: L.M.N., E.P.P., E.S.;

5 Formal Analysis: L.M.N.;

6 Investigation: D.L., E.C.;

7 Resources: E.C.;

8 Writing – Original Draft: L.M.N., D.L.;

9 Writing – Review & Editing: L.M.N., R.S., P.N., E.C., D.L.;

10 Funding Acquisition: P.N., E.C.;

11 Supervision: D.L.

12

13 **Declaration of Interests**

14 The authors declare no competing interests.

15

16

17

## 1 **References**

2

- 3 1 Ngugi, A. K., Bottomley, C., Kleinschmidt, I., Sander, J. W. & Newton, C. R.  
4 Estimation of the burden of active and life-time epilepsy: a meta-analytic approach.  
5 *Epilepsia* **51**, 883-890, doi:10.1111/j.1528-1167.2009.02481.x (2010).
- 6 2 EpiPM Consortium. A roadmap for precision medicine in the epilepsies. *Lancet*  
7 *Neurol* **14**, 1219-1228, doi:10.1016/S1474-4422(15)00199-4 (2015).
- 8 3 Heyne, H. O. *et al.* De novo variants in neurodevelopmental disorders with epilepsy.  
9 *Nat Genet* **50**, 1048-1053, doi:10.1038/s41588-018-0143-7 (2018).
- 10 4 Scheffer, I. E. *et al.* ILAE classification of the epilepsies: Position paper of the ILAE  
11 Commission for Classification and Terminology. *Epilepsia* **58**, 512-521,  
12 doi:10.1111/epi.13709 (2017).
- 13 5 Berg, A. T. *et al.* Revised terminology and concepts for organization of seizures and  
14 epilepsies: report of the ILAE Commission on Classification and Terminology, 2005-  
15 2009. *Epilepsia* **51**, 676-685, doi:10.1111/j.1528-1167.2010.02522.x (2010).
- 16 6 ILAE Consortium on Complex Epilepsies Consortium. Genome-wide mega-analysis  
17 identifies 16 loci and highlights diverse biological mechanisms in the common  
18 epilepsies. *Nat Commun* **9**, 5269, doi:10.1038/s41467-018-07524-z (2018).
- 19 7 Epi4K Consortium *et al.* De novo mutations in epileptic encephalopathies. *Nature*  
20 **501**, 217-221, doi:10.1038/nature12439 (2013).
- 21 8 Noebels, J. L. Single-Gene Determinants of Epilepsy Comorbidity. *Cold Spring Harb*  
22 *Perspect Med* **5**, doi:10.1101/cshperspect.a022756 (2015).
- 23 9 Dibbens, L. M. *et al.* X-linked protocadherin 19 mutations cause female-limited  
24 epilepsy and cognitive impairment. *Nat Genet* **40**, 776-781, doi:10.1038/ng.149  
25 (2008).
- 26 10 Helbig, I., Heinzen, E. L., Mefford, H. C. & Commission, I. G. Primer Part 1-The  
27 building blocks of epilepsy genetics. *Epilepsia* **57**, 861-868, doi:10.1111/epi.13381  
28 (2016).
- 29 11 Devinsky, O. *et al.* Epilepsy. *Nat Rev Dis Primers* **4**, 18024,  
30 doi:10.1038/nrdp.2018.24 (2018).
- 31 12 Moller, R. S. *et al.* Germline and somatic mutations in the MTOR gene in focal  
32 cortical dysplasia and epilepsy. *Neurol Genet* **2**, e118,  
33 doi:10.1212/NXG.0000000000000118 (2016).
- 34 13 Mefford, H. C. *et al.* Rare copy number variants are an important cause of epileptic  
35 encephalopathies. *Ann Neurol* **70**, 974-985, doi:10.1002/ana.22645 (2011).

- 1 14 Heinzen, E. L. *et al.* Rare deletions at 16p13.11 predispose to a diverse spectrum of  
2 sporadic epilepsy syndromes. *Am J Hum Genet* **86**, 707-718,  
3 doi:10.1016/j.ajhg.2010.03.018 (2010).
- 4 15 de Kovel, C. G. *et al.* Recurrent microdeletions at 15q11.2 and 16p13.11 predispose  
5 to idiopathic generalized epilepsies. *Brain* **133**, 23-32, doi:10.1093/brain/awp262  
6 (2010).
- 7 16 Helbig, I. *et al.* 15q13.3 microdeletions increase risk of idiopathic generalized  
8 epilepsy. *Nat Genet* **41**, 160-162, doi:10.1038/ng.292 (2009).
- 9 17 Lal, D. *et al.* Burden analysis of rare microdeletions suggests a strong impact of  
10 neurodevelopmental genes in genetic generalised epilepsies. *PLoS Genet* **11**,  
11 e1005226, doi:10.1371/journal.pgen.1005226 (2015).
- 12 18 Mefford, H. C. *et al.* Genome-wide copy number variation in epilepsy: novel  
13 susceptibility loci in idiopathic generalized and focal epilepsies. *PLoS Genet* **6**,  
14 e1000962, doi:10.1371/journal.pgen.1000962 (2010).
- 15 19 Mullen, S. A. *et al.* Copy number variants are frequent in genetic generalized  
16 epilepsy with intellectual disability. *Neurology* **81**, 1507-1514,  
17 doi:10.1212/WNL.0b013e3182a95829 (2013).
- 18 20 Dibbens, L. M. *et al.* Familial and sporadic 15q13.3 microdeletions in idiopathic  
19 generalized epilepsy: precedent for disorders with complex inheritance. *Hum Mol*  
20 *Genet* **18**, 3626-3631, doi:10.1093/hmg/ddp311 (2009).
- 21 21 Olson, H. *et al.* Copy number variation plays an important role in clinical epilepsy.  
22 *Ann Neurol* **75**, 943-958, doi:10.1002/ana.24178 (2014).
- 23 22 Perez-Palma, E. *et al.* Heterogeneous contribution of microdeletions in the  
24 development of common generalised and focal epilepsies. *J Med Genet* **54**, 598-606,  
25 doi:10.1136/jmedgenet-2016-104495 (2017).
- 26 23 Addis, L. *et al.* Analysis of rare copy number variation in absence epilepsies. *Neurol*  
27 *Genet* **2**, e56, doi:10.1212/NXG.0000000000000056 (2016).
- 28 24 Striano, P. *et al.* Clinical significance of rare copy number variations in epilepsy: a  
29 case-control survey using microarray-based comparative genomic hybridization. *Arch*  
30 *Neurol* **69**, 322-330, doi:10.1001/archneurol.2011.1999 (2012).
- 31 25 Mefford, H. C. CNVs in Epilepsy. *Curr Genet Med Rep* **2**, 162-167,  
32 doi:10.1007/s40142-014-0046-6 (2014).
- 33 26 Lal, D. *et al.* Extending the phenotypic spectrum of RBFOX1 deletions: Sporadic  
34 focal epilepsy. *Epilepsia* **56**, e129-133, doi:10.1111/epi.13076 (2015).
- 35 27 Chang, C. C. *et al.* Second-generation PLINK: rising to the challenge of larger and  
36 richer datasets. *Gigascience* **4**, 7, doi:10.1186/s13742-015-0047-8 (2015).

- 1 28 Pinto, D. *et al.* Comprehensive assessment of array-based platforms and calling  
2 algorithms for detection of copy number variants. *Nat Biotechnol* **29**, 512-520,  
3 doi:10.1038/nbt.1852 (2011).
- 4 29 Wang, K. *et al.* PennCNV: an integrated hidden Markov model designed for high-  
5 resolution copy number variation detection in whole-genome SNP genotyping data.  
6 *Genome Res* **17**, 1665-1674, doi:10.1101/gr.6861907 (2007).
- 7 30 Huang, A. Y. *et al.* Rare Copy Number Variants in NRXN1 and CNTN6 Increase Risk  
8 for Tourette Syndrome. *Neuron* **94**, 1101-1111 e1107,  
9 doi:10.1016/j.neuron.2017.06.010 (2017).
- 10 31 Marshall, C. R. *et al.* Contribution of copy number variants to schizophrenia from a  
11 genome-wide study of 41,321 subjects. *Nat Genet* **49**, 27-35, doi:10.1038/ng.3725  
12 (2017).
- 13 32 Purcell, S. *et al.* PLINK: a tool set for whole-genome association and population-  
14 based linkage analyses. *Am J Hum Genet* **81**, 559-575, doi:10.1086/519795 (2007).
- 15 33 Deciphering Developmental Disorders Study. Prevalence and architecture of de novo  
16 mutations in developmental disorders. *Nature* **542**, 433-438,  
17 doi:10.1038/nature21062 (2017).
- 18 34 Lek, M. *et al.* Analysis of protein-coding genetic variation in 60,706 humans. *Nature*  
19 **536**, 285-291, doi:10.1038/nature19057 (2016).
- 20 35 Carvill, G. L. & Mefford, H. C. Microdeletion syndromes. *Curr Opin Genet Dev* **23**,  
21 232-239, doi:10.1016/j.gde.2013.03.004 (2013).
- 22 36 Coppola, A. *et al.* Diagnostic implications of genetic copy number variation in  
23 epilepsy plus. *Epilepsia* **60**, 689-706, doi:10.1111/epi.14683 (2019).
- 24 37 Miller, D. T. *et al.* Consensus statement: chromosomal microarray is a first-tier  
25 clinical diagnostic test for individuals with developmental disabilities or congenital  
26 anomalies. *Am J Hum Genet* **86**, 749-764, doi:10.1016/j.ajhg.2010.04.006 (2010).
- 27 38 Kearney, H. M. *et al.* American College of Medical Genetics standards and guidelines  
28 for interpretation and reporting of postnatal constitutional copy number variants.  
29 *Genet Med* **13**, 680-685, doi:10.1097/GIM.0b013e3182217a3a (2011).
- 30 39 Monlong, J. *et al.* Global characterization of copy number variants in epilepsy  
31 patients from whole genome sequencing. *PLoS Genet* **14**, e1007285,  
32 doi:10.1371/journal.pgen.1007285 (2018).
- 33 40 Scheffer, I. E. & Mefford, H. C. Epilepsy: Beyond the single nucleotide variant in  
34 epilepsy genetics. *Nat Rev Neurol* **10**, 490-491, doi:10.1038/nrneurol.2014.146  
35 (2014).

- 1 41 Zarrei, M., MacDonald, J. R., Merico, D. & Scherer, S. W. A copy number variation  
2 map of the human genome. *Nat Rev Genet* **16**, 172-183, doi:10.1038/nrg3871  
3 (2015).
- 4 42 Levy, D. *et al.* Rare de novo and transmitted copy-number variation in autistic  
5 spectrum disorders. *Neuron* **70**, 886-897, doi:10.1016/j.neuron.2011.05.015 (2011).
- 6 43 Sanders, S. J. *et al.* Multiple recurrent de novo CNVs, including duplications of the  
7 7q11.23 Williams syndrome region, are strongly associated with autism. *Neuron* **70**,  
8 863-885, doi:10.1016/j.neuron.2011.05.002 (2011).
- 9 44 Weiss, L. A. *et al.* Association between microdeletion and microduplication at  
10 16p11.2 and autism. *N Engl J Med* **358**, 667-675, doi:10.1056/NEJMoa075974  
11 (2008).
- 12 45 Glessner, J. T. *et al.* Autism genome-wide copy number variation reveals ubiquitin  
13 and neuronal genes. *Nature* **459**, 569-573, doi:10.1038/nature07953 (2009).
- 14 46 Mefford, H. C., Batshaw, M. L. & Hoffman, E. P. Genomics, intellectual disability, and  
15 autism. *N Engl J Med* **366**, 733-743, doi:10.1056/NEJMra1114194 (2012).
- 16 47 Mefford, H. C. & Eichler, E. E. Duplication hotspots, rare genomic disorders, and  
17 common disease. *Curr Opin Genet Dev* **19**, 196-204, doi:10.1016/j.gde.2009.04.003  
18 (2009).
- 19 48 Mefford, H. C. & Mulley, J. C. Genetically complex epilepsies, copy number variants  
20 and syndrome constellations. *Genome Med* **2**, 71, doi:10.1186/gm192 (2010).
- 21 49 Brunetti-Pierri, N. *et al.* Recurrent reciprocal 1q21.1 deletions and duplications  
22 associated with microcephaly or macrocephaly and developmental and behavioral  
23 abnormalities. *Nat Genet* **40**, 1466-1471, doi:10.1038/ng.279 (2008).
- 24 50 Coe, B. P., Girirajan, S. & Eichler, E. E. A genetic model for neurodevelopmental  
25 disease. *Curr Opin Neurobiol* **22**, 829-836, doi:10.1016/j.conb.2012.04.007 (2012).
- 26 51 Barber, J. C. Directly transmitted unbalanced chromosome abnormalities and  
27 euchromatic variants. *J Med Genet* **42**, 609-629, doi:10.1136/jmg.2004.026955  
28 (2005).
- 29 52 Liehr, T. Cytogenetically visible copy number variations (CG-CNVs) in banding and  
30 molecular cytogenetics of human; about heteromorphisms and euchromatic variants.  
31 *Mol Cytogenet* **9**, 5, doi:10.1186/s13039-016-0216-1 (2016).
- 32 53 Zou, Y. S., Huang, X. L., Ito, M., Newton, S. & Milunsky, J. M. Further delineation of  
33 the critical region for the 9p-duplication syndrome. *Am J Med Genet A* **149A**, 272-  
34 276, doi:10.1002/ajmg.a.32607 (2009).
- 35 54 Di Bartolo, D. L. *et al.* Characterization of a complex rearrangement involving  
36 duplication and deletion of 9p in an infant with craniofacial dysmorphism and cardiac  
37 anomalies. *Mol Cytogenet* **5**, 31, doi:10.1186/1755-8166-5-31 (2012).

- 1 55 Centerwall, W. R. & Beatty-DeSana, J. W. The trisomy 9p syndrome. *Pediatrics* **56**,  
2 748-755 (1975).
- 3 56 Wilson, G. N., Raj, A. & Baker, D. The phenotypic and cytogenetic spectrum of partial  
4 trisomy 9. *Am J Med Genet* **20**, 277-282, doi:10.1002/ajmg.1320200211 (1985).
- 5 57 Smart, R. D., Viljoen, D. L. & Fraser, B. Partial trisomy 9--further delineation of the  
6 phenotype. *Am J Med Genet* **31**, 947-951, doi:10.1002/ajmg.1320310430 (1988).
- 7 58 Sudmant, P. H. *et al.* An integrated map of structural variation in 2,504 human  
8 genomes. *Nature* **526**, 75-81, doi:10.1038/nature15394 (2015).
- 9 59 Brandler, W. M. *et al.* Frequency and Complexity of De Novo Structural Mutation in  
10 Autism. *Am J Hum Genet* **98**, 667-679, doi:10.1016/j.ajhg.2016.02.018 (2016).
- 11 60 Gymrek, M. *et al.* Abundant contribution of short tandem repeats to gene expression  
12 variation in humans. *Nat Genet* **48**, 22-29, doi:10.1038/ng.3461 (2016).
- 13
